# Supplementary material for: Torque-dense photomechanical actuation
Source: Royal Society of Chemistry journal article supplement (doi:10.1039/d0sm01352h), 2020-11-13
Supplement: d0sm01352h7.pdf [file d0sm01352h7.pdf]

## Supplementary Information: Torque-Dense Photomechanical Actuation

### Stiffness Comparison in Flat and Curved Structures

Bending stiffness of a flat and a curved structure (made of rectangular 10mm(W) × 6mm(L) × 50 μm ALCP sheet) are qualitatively compared by attaching weight of a 2 gr to the tip of both structures. At this specific loading condition, the flat structure bends while no bending is observed in the curved structure.

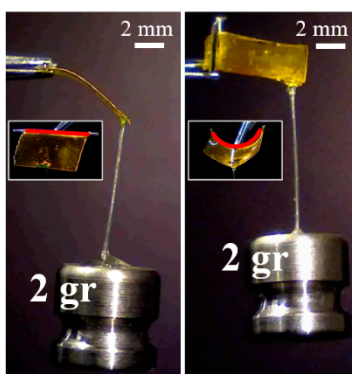

Figure SI1: Comparison of the bending stiffness for flat and curved samples of same size. Flat sample (left) bends while the curved sample (right) stays undeformed. The inset shows the cross section of samples with the red line highlighting the flat and curved geometry.

### Characterization of Splayed ALCP

After synthesizing ALCP (50 μm), a 5mm × 5mm squared sheet was cut from the sample and was characterized using polarized optical microscopy.

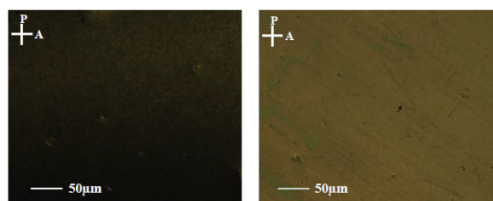

Figure SI2: Polarized optical microscopy (POM) images of splayed ALCP under cross polarizers which the planar alignment is 0° and 45° corresponding to the polarizer.

### Behavior of a flat ALCP actuator

Sample with a flat cross-section was fabricated by attaching a wire along its periphery but keeping it straight. A load was attached to the tip of the actuator and irradiated. The actuation is quasistatic, in comparison to that observed in SI Movie 5, when a transverse curvature is imposed.

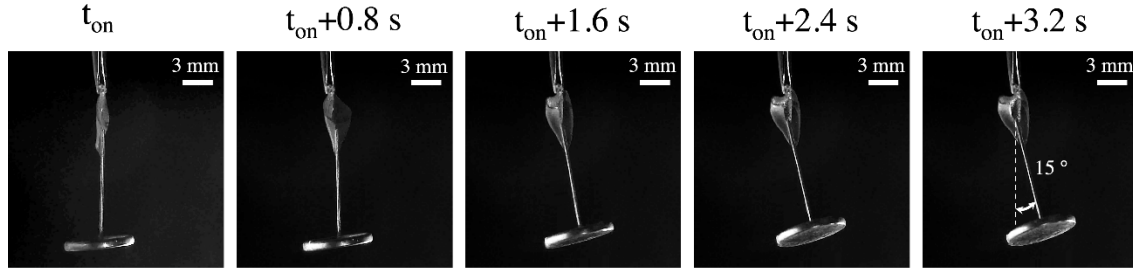

Figure SI3: Time sequenced images of the progressive quasistatic actuation of a loaded actuator, when the Cu wire is straight and the ALCP is flat.

### Fabrication of the Boundary Constrained ALCP Actuators

A rectangular shape splayed ALCP (10mm×6mm) was cut from a thin film of 50 μm thickness (Figure SI4.a-b). Using a commercially available acrylate-based glue, a copper wire was glued along the longer edge of the sample (10 mm) and on the surface with planar nematic direction (Figure SI4.c). The ALCP film and the wire were wrapped around a cylinder with the desired diameter in a way that the planar surface and the wire were on the convex side (Figure SI4.d). The two free ends of the wire are connected to fix the curvature and is later used to hold the sample in front of the UV source with a tweezer (Figure SI4.e)

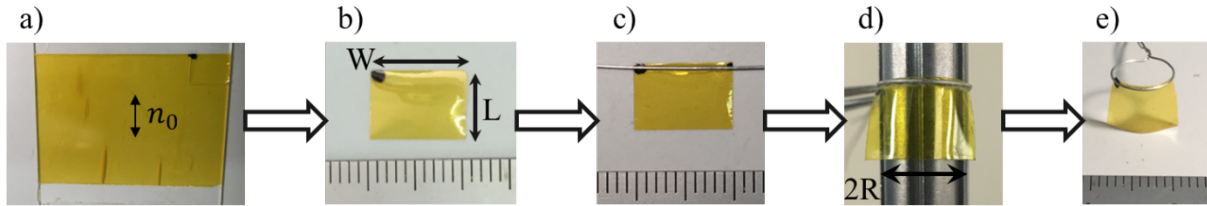

Figure SI4: Fabrication of boundary confined shell using ALCP films. The scale is in mm.

### Torque Calculation

The torque ( $\tau$ ), angular momentum ( $L$ ), and energy (KE) are related by:

$$\tau = \dot{L} = \frac{dL}{dt} = \frac{dI\omega}{dt} = I \frac{d\omega}{dt} = I\alpha$$

$L = I\omega$  with  $I$ , the moment of inertia and  $\omega$ , the angular velocity. Kinetic energy (KE) is:

$$KE = \frac{1}{2}I\omega^2 = \frac{1}{2}L\omega$$

From the balance of internal power, in the absence of external forces:

$$\int P_{int} dv + \frac{D}{Dt} KE = \int P_{out} dv, P_{out} = 0$$

$$\frac{D}{Dt} KE = \frac{D}{Dt} \left( \frac{1}{2} L \omega \right) = \left( \frac{1}{2} \dot{L} \omega + L \dot{\omega} \right) = \left( \frac{1}{2} \tau \omega + L \alpha \right) = \tau \omega$$

where P indicates the stress power (rate of change of strain energy density). For the Neo-Hookean material, with  $\dot{W} = P_{int}$ , we find that:

$$\int \dot{W} dv + \tau \dot{\phi} = 0$$

And,

$$\tau \Delta \phi = \tau \dot{\phi} = -\Delta \psi$$

This equation is used for determining the torque density generated in the system. Using the equation above and conducting COMSOL simulations for various geometrical parameters we can get the trends shown in Figure SI3 for torque density of prebiased actuators and the photostrain that is required to get the snap-through.

### Torque-Density as a Function of Geometry of the Photoactuators.

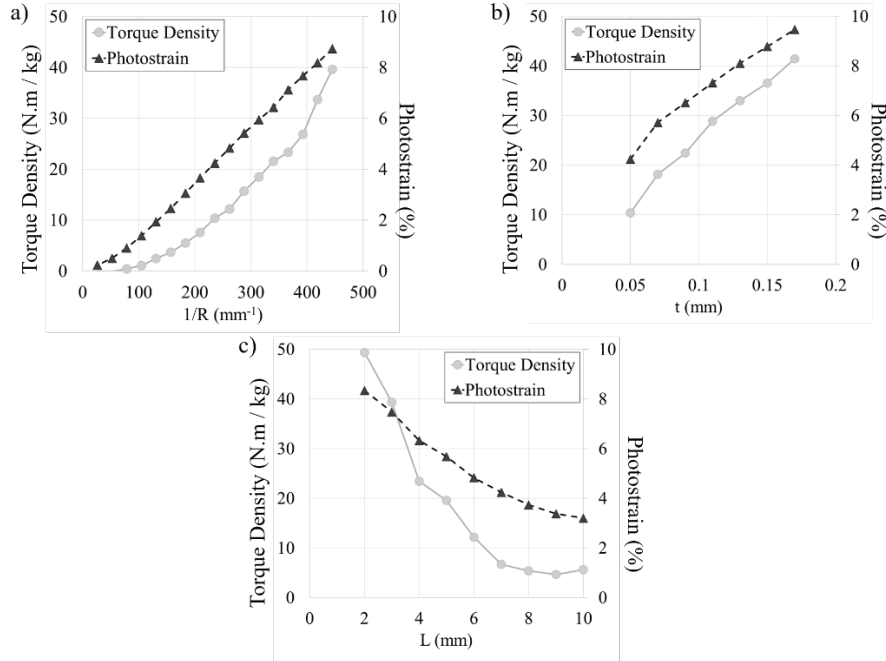

Figure SI5: Torque density as a function of initial curvature, thickness of the film and length of the film. The photostrain values correspond to that needed to trigger the instability. Torque density is measured as a function of a) the radius ( $R$ ) of the transversely curved shell. b) thickness ( $t$ ) of the actuator and c) the length of the actuator

In these simulations all geometrical parameters except one are kept constant. As can be seen in Figure SI5.a, by increasing the initial curvature of the actuator (smaller  $R$ ) we get higher generated torque densities. This comes at a price. Higher torque densities require larger photostrain that is

generated along the nematic director. The tradeoff is repeated as a function of thickness ( $t$ ) in Figure SI5.b. The effect of actuator's length ( $L$ ) in the rotary actuation is presented in Figure SI5.c. The results obtained from these simulations show the longer actuators make for weaker rotary actuators.

### Geometric Scaling of Curved Crease Photoactuators

A parameter that play a significant role in determining the development of the instabilities is  $\phi$ , the bending angle at the hinge immediately after the snap-through. Assuming a constant first principal curvature that is defined by the prebiased curvature,  $\kappa_1 = \kappa_0 = 1/R$ , the second principal curvature at the location of the curved crease can be determined using the angle  $\phi$ , where:

$$\kappa_2 = \frac{1}{R_c} = \frac{\phi}{w_c}$$

We assume that the snap-through leads to an isometric transformation from the transversely curved shell to a segmented geometry. Here, translation arises along the sample's length and involves a mirror symmetry about the osculating plane. The osculating plane forms the bisector of  $\phi$  (1). The folding curve that defines the hinging during the creasing is composed of the ends near the edges of the sample, where they are affixed and the vertex of the crease (Figure 3b). Thus,  $\phi$  can be written as,

$$\phi = 2 \arctan \left( \frac{R \left( 1 - \cos \left( \frac{\theta}{2} \right) \right)}{l} \right) \sim \frac{R\theta^2}{l}$$

where  $R$  and  $\theta$  are as defined in Figure 3b.  $l$  is from the fixed boundary, and essentially,  $l = L$ . Thus, the angle of actuation scales with  $\frac{R\theta^2}{L} = W^2/RL$ , as shown in the in Figure 3d.

## Repetitive Actuation Cycles

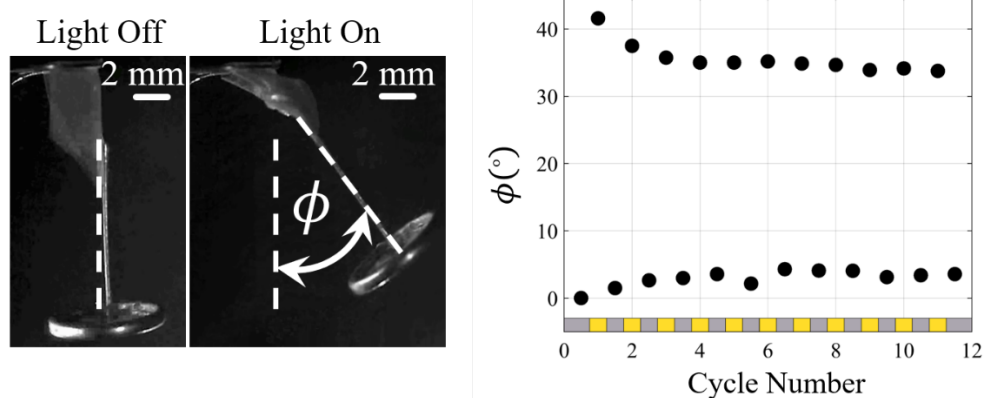

Figure SI6: Actuation over multiple on/off irradiation cycles. The angle  $\phi$  is tracked following snap-through (x-axis yellow) as well as after it resets spontaneously in the dark (x-axis gray)

## Synthesis of lower modulus azobenzene-functionalized liquid crystal polymers (ALCP-LM):

Splay ALCP-LM film were synthesized by copolymerizing a formulation composed from 19 wt% of 1,4-Bis-[4-(6-acryloyloxyhexyloxy)benzoyloxy]-2-methylbenzene (RM82), 44 wt% of 4-[[6-[(1-Oxo-2-propen-1-yl)oxy]hexyl]oxy]benzoic Acid 4-methoxyphenyl Ester, 16 wt% of 4-[[6-[(1-Oxo-2-propen-1-yl)oxy]hexyl]oxy]benzoic Acid 4-methoxyphenyl Ester, 14 wt % of 2,2' (Ethylenedioxy)diethanethiol (EDDT), 6 wt % of 4,4'-(di(6 (acryloxy)hexyloxy)azobenzene) and 1 wt% photoinitiator Irgacure (I-784) to a glass vial and thoroughly mixing. To make a splayed molecular orientation sample one glass side was coated with Elvamide (Dupont 8023R) and rubbed. The other glass slide was coated with a material that induces homeotropic alignment Nissan Chemical SE5661. The, the slides were glued together with 50  $\mu\text{m}$  silica spacers. The monomer mixture was filled into the gap of the splay aligned cells by capillary action in a dark room conditions on a hotplate at 100°C. Then, the sample was cooled to the nematic phase  $\sim 45^\circ\text{C}$  and polymerized using light for 60 min. An Edmund MI-150 high-intensity illuminator equipped with a cut off filter ( $\lambda \geq 420\text{ nm}$ , 35 mW/  $\text{cm}^2$ ) was used.

## References:

1. N. P. Bende, et al., Geometrically controlled snapping transitions in shells with curved creases. Proc. Natl. Acad. Sci. U. S. A. 112, 11175–11180 (2015).

**SI Movie Captions:**

SI Movie 1: Actuation of  $R=3.7\text{mm}$  sample that is overlaid with the simulation.

SI Movie 2: Actuation of  $R=2.2\text{mm}$  sample that is overlaid with the simulation.

SI Movie 3: Harnessing the flexural actuation from snap-through in a vertical lifter.

SI Movie 4: Harnessing the flexural actuation from snap-through in a gripper.

SI Movie 5: Benchmarking the torque-dense actuation in the presence of a load.

SI Movie 6: Optically modulated photomechanical actuation.

**Table SI1: Data used to populate the property-space map in Figure 2c**

| Type             | Model                                                                                                                                                                         | Torque<br>(N.m) | Weight<br>(gr) | Torque Density<br>(N.m/K.gr) | Rotational Speed<br>(rad/sec) |
|------------------|-------------------------------------------------------------------------------------------------------------------------------------------------------------------------------|-----------------|----------------|------------------------------|-------------------------------|
| <b>Pneumatic</b> |                                                                                                                                                                               |                 |                |                              |                               |
|                  | phd-RA Series                                                                                                                                                                 | 1.6             | 8.20E+02       | 1.95E+00                     | 62.83                         |
|                  | <a href="https://www.phdinc.com/product/?product=rolary-actuators&amp;series=ra#/Catalog">https://www.phdinc.com/product/?product=rolary-actuators&amp;series=ra#/Catalog</a> | 1.6             | 8.20E+02       | 1.95E+00                     | 62.83                         |
|                  |                                                                                                                                                                               | 1.6             | 1.04E+03       | 1.54E+00                     | 62.83                         |
|                  |                                                                                                                                                                               | 3.1             | 1.09E+03       | 2.84E+00                     | 62.83                         |
|                  |                                                                                                                                                                               | 3.1             | 1.27E+03       | 2.44E+00                     | 62.83                         |
|                  |                                                                                                                                                                               | 3.1             | 1.63E+03       | 1.90E+00                     | 62.83                         |
|                  |                                                                                                                                                                               | 6.8             | 1.95E+03       | 3.49E+00                     | 62.83                         |
|                  |                                                                                                                                                                               | 6.8             | 2.22E+03       | 3.06E+00                     | 62.83                         |
|                  |                                                                                                                                                                               | 6.8             | 2.94E+03       | 2.31E+00                     | 62.83                         |
|                  |                                                                                                                                                                               | 12.8            | 3.49E+03       | 3.67E+00                     | 41.89                         |
|                  |                                                                                                                                                                               | 12.8            | 3.99E+03       | 3.21E+00                     | 41.89                         |
|                  |                                                                                                                                                                               | 12.8            | 5.35E+03       | 2.39E+00                     | 41.89                         |
|                  |                                                                                                                                                                               | 24.9            | 5.26E+03       | 4.73E+00                     | 41.89                         |
|                  |                                                                                                                                                                               | 24.9            | 5.81E+03       | 4.29E+00                     | 41.89                         |
|                  |                                                                                                                                                                               | 24.9            | 8.03E+03       | 3.10E+00                     | 41.89                         |
|                  | RL Series                                                                                                                                                                     | 0.5             | 1.30E+02       | 3.85E+00                     | 104.72                        |
|                  | <a href="https://www.phdinc.com/product/?product=rolary-actuators&amp;series=rl#/Catalog">https://www.phdinc.com/product/?product=rolary-actuators&amp;series=rl#/Catalog</a> | 0.5             | 1.80E+02       | 2.78E+00                     | 104.72                        |
|                  |                                                                                                                                                                               | 0.5             | 1.80E+02       | 2.78E+00                     | 104.72                        |
|                  |                                                                                                                                                                               | 1               | 1.80E+02       | 5.56E+00                     | 104.72                        |
|                  |                                                                                                                                                                               | 1               | 2.20E+02       | 4.55E+00                     | 104.72                        |
|                  |                                                                                                                                                                               | 1               | 2.70E+02       | 3.70E+00                     | 104.72                        |
|                  |                                                                                                                                                                               | 2               | 3.20E+02       | 6.25E+00                     | 62.83                         |
|                  |                                                                                                                                                                               | 2               | 3.60E+02       | 5.56E+00                     | 62.83                         |
|                  |                                                                                                                                                                               | 2               | 4.10E+02       | 4.88E+00                     | 62.83                         |
|                  |                                                                                                                                                                               | 3.7             | 5.00E+02       | 7.40E+00                     | 62.83                         |
|                  |                                                                                                                                                                               | 3.7             | 5.40E+02       | 6.85E+00                     | 62.83                         |
|                  |                                                                                                                                                                               | 3.7             | 6.40E+02       | 5.78E+00                     | 62.83                         |
|                  |                                                                                                                                                                               | 7.7             | 7.70E+02       | 1.00E+01                     | 62.83                         |
|                  |                                                                                                                                                                               | 7.7             | 9.10E+02       | 8.46E+00                     | 62.83                         |
|                  |                                                                                                                                                                               | 7.7             | 1.04E+03       | 7.40E+00                     | 62.83                         |
|                  |                                                                                                                                                                               | 16              | 1.17E+03       | 1.37E+01                     | 52.36                         |
|                  |                                                                                                                                                                               | 16              | 1.49E+03       | 1.07E+01                     | 52.36                         |
|                  |                                                                                                                                                                               | 16              | 1.95E+03       | 8.21E+00                     | 52.36                         |
|                  |                                                                                                                                                                               | 29.9            | 2.36E+03       | 1.27E+01                     | 41.89                         |
|                  |                                                                                                                                                                               | 29.9            | 2.72E+03       | 1.10E+01                     | 41.89                         |
|                  |                                                                                                                                                                               | 29.9            | 3.13E+03       | 9.55E+00                     | 41.89                         |
|                  |                                                                                                                                                                               | 59.4            | 4.17E+03       | 1.42E+01                     | 41.89                         |
|                  |                                                                                                                                                                               | 59.4            | 4.76E+03       | 1.25E+01                     | 41.89                         |
|                  |                                                                                                                                                                               | 59.4            | 5.57E+03       | 1.07E+01                     | 41.89                         |



|                           |                                                                                                                                                |                                                                                                                                                                                                                                                                                   |        |          |          |        |
|---------------------------|------------------------------------------------------------------------------------------------------------------------------------------------|-----------------------------------------------------------------------------------------------------------------------------------------------------------------------------------------------------------------------------------------------------------------------------------|--------|----------|----------|--------|
|                           | RCC Series                                                                                                                                     | <a href="https://www.phidinc.com/product/?product=rotary-actuators&amp;series=rcc/Catalog">https://www.phidinc.com/product/?product=rotary-actuators&amp;series=rcc/Catalog</a>                                                                                                   | 0.2037 | 1.50E+02 | 1.36E+00 | 19.63  |
|                           |                                                                                                                                                |                                                                                                                                                                                                                                                                                   | 0.2037 | 1.40E+02 | 1.46E+00 | 19.63  |
|                           |                                                                                                                                                |                                                                                                                                                                                                                                                                                   | 0.5656 | 3.00E+02 | 1.89E+00 | 13.09  |
|                           |                                                                                                                                                |                                                                                                                                                                                                                                                                                   | 0.5656 | 2.80E+02 | 2.02E+00 | 13.09  |
|                           |                                                                                                                                                |                                                                                                                                                                                                                                                                                   | 1.5491 | 5.50E+02 | 2.82E+00 | 13.09  |
|                           |                                                                                                                                                |                                                                                                                                                                                                                                                                                   | 1.5491 | 5.30E+02 | 2.92E+00 | 13.09  |
|                           | RF Series                                                                                                                                      |                                                                                                                                                                                                                                                                                   | 0.748  | 2.80E+02 | 2.67E+00 | 8.98   |
|                           |                                                                                                                                                | <a href="https://www.phidinc.com/product/?product=rotary&amp;series=r/Catalog">https://www.phidinc.com/product/?product=rotary&amp;series=r/Catalog</a>                                                                                                                           | 2.72   | 8.50E+02 | 3.20E+00 | 7.31   |
|                           |                                                                                                                                                |                                                                                                                                                                                                                                                                                   | 7.412  | 1.56E+03 | 4.75E+00 | 8.49   |
|                           | RI Series                                                                                                                                      |                                                                                                                                                                                                                                                                                   | 4.148  | 1.36E+03 | 3.05E+00 | 24.17  |
|                           |                                                                                                                                                | <a href="https://www.phidinc.com/product/?product=rotary-actuators&amp;series=r/Catalog">https://www.phidinc.com/product/?product=rotary-actuators&amp;series=r/Catalog</a>                                                                                                       | 8.228  | 1.59E+03 | 5.17E+00 | 13.66  |
|                           |                                                                                                                                                |                                                                                                                                                                                                                                                                                   | 4.148  | 1.86E+03 | 2.23E+00 | 13.66  |
|                           |                                                                                                                                                |                                                                                                                                                                                                                                                                                   | 8.16   | 3.44E+03 | 2.37E+00 | 28.56  |
|                           |                                                                                                                                                |                                                                                                                                                                                                                                                                                   | 16.184 | 3.63E+03 | 4.46E+00 | 11.22  |
|                           |                                                                                                                                                |                                                                                                                                                                                                                                                                                   | 8.16   | 4.36E+03 | 1.87E+00 | 11.22  |
|                           |                                                                                                                                                |                                                                                                                                                                                                                                                                                   | 26.52  | 6.48E+03 | 4.09E+00 | 24.17  |
|                           |                                                                                                                                                |                                                                                                                                                                                                                                                                                   | 53.04  | 6.80E+03 | 7.80E+00 | 11.22  |
|                           |                                                                                                                                                |                                                                                                                                                                                                                                                                                   | 26.52  | 7.98E+03 | 3.32E+00 | 11.22  |
| A-601.025                 | A-60x Pigtide RT Rotary Air Bearing Module                                                                                                     | <a href="https://www.physikinstrumente.com/en/products/air-bearing-stages/a-60x-pigtide-rt-rotary-air-bearing-module-900719/#specification">https://www.physikinstrumente.com/en/products/air-bearing-stages/a-60x-pigtide-rt-rotary-air-bearing-module-900719/#specification</a> | 0.57   | 1.50E+02 | 3.80E+00 | 314.16 |
| A-602.038                 |                                                                                                                                                |                                                                                                                                                                                                                                                                                   | 1.13   | 4.00E+02 | 2.83E+00 | 314.16 |
| A-603.025                 |                                                                                                                                                |                                                                                                                                                                                                                                                                                   | 1.7    | 7.00E+02 | 2.43E+00 | 314.16 |
| A-603.050                 |                                                                                                                                                |                                                                                                                                                                                                                                                                                   | 4.52   | 8.00E+02 | 5.65E+00 | 314.16 |
| A-604.050                 |                                                                                                                                                |                                                                                                                                                                                                                                                                                   | 22.6   | 2.10E+03 | 1.08E+01 | 314.16 |
| A-604.090                 |                                                                                                                                                |                                                                                                                                                                                                                                                                                   | 36.7   | 2.60E+03 | 1.41E+01 | 314.16 |
| A-605.065                 |                                                                                                                                                |                                                                                                                                                                                                                                                                                   | 39.6   | 4.60E+03 | 8.61E+00 | 209.44 |
| A-605.100                 |                                                                                                                                                |                                                                                                                                                                                                                                                                                   | 67.8   | 5.30E+03 | 1.28E+01 | 209.44 |
| A-607.075                 |                                                                                                                                                |                                                                                                                                                                                                                                                                                   | 141.3  | 1.94E+04 | 7.28E+00 | 104.72 |
| A-607.175                 |                                                                                                                                                |                                                                                                                                                                                                                                                                                   | 282.5  | 2.60E+04 | 1.09E+01 | 104.72 |
| <b>AC Rotary Actuator</b> |                                                                                                                                                |                                                                                                                                                                                                                                                                                   |        |          |          |        |
| (Exlar)                   | R2M/G075 ( <a href="https://exlar.com/product/trix-iac-rotary-actuator/specs/">https://exlar.com/product/trix-iac-rotary-actuator/specs/</a> ) |                                                                                                                                                                                                                                                                                   | 2.8    | 3.40E+03 | 8.24E+01 | 418.88 |
|                           |                                                                                                                                                |                                                                                                                                                                                                                                                                                   | 4.75   | 4.20E+03 | 1.13E+00 | 314.16 |
|                           |                                                                                                                                                |                                                                                                                                                                                                                                                                                   | 6.33   | 4.90E+03 | 1.29E+00 | 209.44 |
|                           | R2M/G090                                                                                                                                       |                                                                                                                                                                                                                                                                                   | 6.8    | 6.40E+03 | 1.06E+00 | 418.88 |
|                           |                                                                                                                                                |                                                                                                                                                                                                                                                                                   | 9      | 6.40E+03 | 1.41E+00 | 314.16 |



|                                 |                                                                                                                                                  |                |       |          |          |        |
|---------------------------------|--------------------------------------------------------------------------------------------------------------------------------------------------|----------------|-------|----------|----------|--------|
|                                 |                                                                                                                                                  | power-050 - AC | 56.6  | 2.36E+04 | 2.40E+00 | 523.60 |
|                                 |                                                                                                                                                  |                | 56.6  | 2.51E+04 | 2.25E+00 | 523.60 |
|                                 |                                                                                                                                                  |                | 15.6  | 1.94E+04 | 8.04E-01 | 523.60 |
|                                 |                                                                                                                                                  | power-110 - AC | 88    | 5.88E+04 | 1.50E+00 | 439.82 |
|                                 |                                                                                                                                                  |                | 88    | 5.96E+04 | 1.48E+00 | 439.82 |
|                                 |                                                                                                                                                  |                | 44.2  | 5.23E+04 | 8.45E-01 | 471.24 |
| <b>DC Rotary Actuator</b>       |                                                                                                                                                  |                |       |          |          |        |
| (Tritek II)                     | RDM/G060 ( <a href="https://exlar.com/product/tritek-ii-rotary-actuator/specs/">https://exlar.com/product/tritek-ii-rotary-actuator/specs/</a> ) |                | 1.44  | 1.40E+03 | 1.03E+00 | 523.60 |
|                                 |                                                                                                                                                  |                | 1.5   | 1.90E+03 | 7.89E-01 | 523.60 |
|                                 |                                                                                                                                                  |                | 1.92  | 2.40E+03 | 8.00E-01 | 418.88 |
|                                 | RDM/G075                                                                                                                                         |                | 2.08  | 3.40E+03 | 6.12E-01 | 418.88 |
|                                 |                                                                                                                                                  |                | 3.16  | 4.20E+03 | 7.52E-01 | 314.16 |
|                                 | RDM/G090                                                                                                                                         |                | 4.63  | 4.90E+03 | 9.45E-01 | 209.44 |
|                                 |                                                                                                                                                  |                | 2.46  | 5.70E+03 | 4.32E-01 | 345.58 |
|                                 |                                                                                                                                                  |                | 4.07  | 7.00E+03 | 5.81E-01 | 188.50 |
|                                 |                                                                                                                                                  |                | 5.97  | 8.40E+03 | 7.11E-01 | 146.61 |
| Miniature High Torque DC Motors | C13-L19-10                                                                                                                                       |                | 0.353 | 1.93E+02 | 1.83E+00 | 314.16 |
| Miniature High Torque DC Motors | C13-L19-20                                                                                                                                       |                | 0.353 | 1.93E+02 | 1.83E+00 | 196.87 |
| Miniature High Torque DC Motors | C13-L19-30                                                                                                                                       |                | 0.353 | 1.93E+02 | 1.83E+00 | 301.07 |
| Miniature High Torque DC Motors | C13-L19-40                                                                                                                                       |                | 0.353 | 1.93E+02 | 1.83E+00 | 233.00 |
| Miniature High Torque DC Motors | C13-L19-50                                                                                                                                       |                | 0.353 | 1.93E+02 | 1.83E+00 | 301.28 |
| Miniature High Torque DC Motors | C13-L25-10                                                                                                                                       |                | 0.53  | 2.55E+02 | 2.08E+00 | 251.33 |
| Miniature High Torque DC Motors | C13-L28-10                                                                                                                                       |                | 0.706 | 3.18E+02 | 2.22E+00 | 172.05 |
| Miniature High Torque DC Motors | C13-L28-20                                                                                                                                       |                | 0.706 | 3.18E+02 | 2.22E+00 | 255.41 |
| Miniature High Torque DC Motors | 21105N-03                                                                                                                                        |                | 0.053 | 8.31E+01 | 6.38E-01 | 680.68 |
| DC Cube Torque Motors           | 21105A-04                                                                                                                                        |                | 0.053 | 8.31E+01 | 6.38E-01 | 680.68 |
| DC Cube Torque Motors           | 21105N-08                                                                                                                                        |                | 0.061 | 8.31E+01 | 7.34E-01 | 680.68 |
| DC Cube Torque Motors           | 21105N-10                                                                                                                                        |                | 0.042 | 8.31E+01 | 5.06E-01 | 680.68 |
| DC Cube Torque Motors           | 21105N-12                                                                                                                                        |                | 0.046 | 8.31E+01 | 5.54E-01 | 733.04 |
| DC Cube Torque Motors           | 21105N-13                                                                                                                                        |                | 0.046 | 8.31E+01 | 5.54E-01 | 733.04 |
| DC Cube Torque Motors           | 21605A-14S                                                                                                                                       |                | 0.078 | 8.31E+01 | 9.39E-01 | 733.04 |
| DC Cube Torque Motors           | 21607A-15S                                                                                                                                       |                | 0.085 | 8.31E+01 | 1.02E+00 | 680.68 |
| DC Cube Torque Motors           | 21607J-16S                                                                                                                                       |                | 0.06  | 8.31E+01 | 7.22E-01 | 481.71 |
| DC Cube Torque Motors           | 21607J-19S                                                                                                                                       |                | 0.085 | 8.31E+01 | 1.02E+00 | 712.09 |
| DC Cube Torque Motors           | 21605A-20S                                                                                                                                       |                | 0.085 | 8.31E+01 | 1.02E+00 | 701.62 |
| DC Cube Torque Motors           | 21105K-22S                                                                                                                                       |                | 0.051 | 8.31E+01 | 6.14E-01 | 356.05 |
| DC Cube Torque Motors           | 22613J-01                                                                                                                                        |                | 0.025 | 5.67E+01 | 4.41E-01 | 523.60 |
| DC Cube Torque Motors           | 22613M-01                                                                                                                                        |                | 0.025 | 5.67E+01 | 4.41E-01 | 523.60 |
| DC Cube Torque Motors           | 23101L-01                                                                                                                                        |                | 0.071 | 1.22E+02 | 5.82E-01 | 607.37 |
| DC Cube Torque Motors           | 23101L-02                                                                                                                                        |                | 0.085 | 1.22E+02 | 6.97E-01 | 575.96 |

|                                                                                                                                                                 |                      |       |          |          |        |
|-----------------------------------------------------------------------------------------------------------------------------------------------------------------|----------------------|-------|----------|----------|--------|
| DC Cube Torque Motors                                                                                                                                           | 24618R-04            | 0.012 | 3.54E+01 | 3.39E+01 | 523.60 |
| DC Cube Torque Motors                                                                                                                                           | 24618N-05            | 0.019 | 3.54E+01 | 5.36E+01 | 599.52 |
| DC Cube Torque Motors                                                                                                                                           | 24618N-09            | 0.007 | 3.54E+01 | 1.98E+01 | 628.32 |
| DC Cube Torque Motors                                                                                                                                           | 24618V-10            | 0.018 | 3.54E+01 | 5.08E+01 | 575.96 |
| DC Cube Torque Motors                                                                                                                                           | 24618V-11            | 0.011 | 3.54E+01 | 3.10E+01 | 691.15 |
| DC Cube Torque Motors                                                                                                                                           | 24618V-15            | 0.007 | 3.54E+01 | 1.98E+01 | 523.60 |
| TPM+ Servo Actuators(Rare Earth Permanent Magnetic)                                                                                                             | dynamic 004 - DC     | 30    | 2.20E+03 | 1.36E+01 | 39.27  |
| <a href="https://www.wittenstein.de/download/alpha-mechatronic-systems-tpm-en.pdf">https://www.wittenstein.de/download/alpha-mechatronic-systems-tpm-en.pdf</a> |                      | 32    | 2.20E+03 | 1.45E+01 | 29.95  |
|                                                                                                                                                                 |                      | 40    | 2.20E+03 | 1.82E+01 | 20.32  |
|                                                                                                                                                                 |                      | 32    | 2.00E+03 | 1.60E+01 | 10.26  |
|                                                                                                                                                                 |                      | 32    | 2.00E+03 | 1.60E+01 | 9.84   |
|                                                                                                                                                                 |                      | 32    | 2.00E+03 | 1.60E+01 | 6.91   |
|                                                                                                                                                                 | dynamic 010 - DC     | 57    | 4.80E+03 | 1.19E+01 | 39.27  |
|                                                                                                                                                                 |                      | 75    | 4.80E+03 | 1.56E+01 | 29.95  |
|                                                                                                                                                                 |                      | 100   | 4.80E+03 | 2.08E+01 | 20.32  |
|                                                                                                                                                                 |                      | 80    | 4.30E+03 | 1.86E+01 | 10.26  |
|                                                                                                                                                                 |                      | 80    | 4.30E+03 | 1.86E+01 | 9.84   |
|                                                                                                                                                                 |                      | 80    | 4.30E+03 | 1.86E+01 | 6.91   |
|                                                                                                                                                                 | dynamic 025 - DC     | 182   | 8.50E+03 | 2.14E+01 | 39.27  |
|                                                                                                                                                                 |                      | 239   | 8.50E+03 | 2.81E+01 | 29.95  |
|                                                                                                                                                                 |                      | 300   | 8.50E+03 | 3.53E+01 | 20.32  |
|                                                                                                                                                                 |                      | 250   | 7.10E+03 | 3.52E+01 | 10.26  |
|                                                                                                                                                                 |                      | 250   | 7.10E+03 | 3.52E+01 | 9.84   |
|                                                                                                                                                                 |                      | 250   | 7.10E+03 | 3.52E+01 | 6.91   |
|                                                                                                                                                                 | dynamic 050 - DC     | 435   | 1.85E+04 | 2.35E+01 | 32.67  |
|                                                                                                                                                                 |                      | 500   | 1.85E+04 | 2.70E+01 | 24.92  |
|                                                                                                                                                                 |                      | 650   | 1.85E+04 | 3.51E+01 | 16.86  |
|                                                                                                                                                                 |                      | 447   | 1.47E+04 | 3.04E+01 | 8.59   |
|                                                                                                                                                                 |                      | 469   | 1.47E+04 | 3.19E+01 | 8.17   |
|                                                                                                                                                                 |                      | 500   | 1.47E+04 | 3.40E+01 | 5.76   |
|                                                                                                                                                                 | high torque 010 - DC | 230   | 7.60E+03 | 3.03E+01 | 23.04  |
|                                                                                                                                                                 |                      | 230   | 7.60E+03 | 3.03E+01 | 18.43  |
|                                                                                                                                                                 |                      | 230   | 7.60E+03 | 3.03E+01 | 13.19  |
|                                                                                                                                                                 |                      | 230   | 7.60E+03 | 3.03E+01 | 9.22   |
|                                                                                                                                                                 |                      | 230   | 8.00E+03 | 2.88E+01 | 5.76   |
|                                                                                                                                                                 |                      | 230   | 8.00E+03 | 2.88E+01 | 4.61   |
|                                                                                                                                                                 |                      | 230   | 6.50E+03 | 3.54E+01 | 3.25   |
|                                                                                                                                                                 |                      | 230   | 6.50E+03 | 3.54E+01 | 2.30   |
|                                                                                                                                                                 | high torque 025 - DC | 530   | 1.48E+04 | 3.58E+01 | 23.04  |
|                                                                                                                                                                 |                      | 530   | 1.48E+04 | 3.58E+01 | 18.43  |
|                                                                                                                                                                 |                      | 530   | 1.48E+04 | 3.58E+01 | 13.19  |
|                                                                                                                                                                 |                      | 530   | 1.48E+04 | 3.58E+01 | 9.22   |

|  |                        |     |          |          |        |
|--|------------------------|-----|----------|----------|--------|
|  |                        | 480 | 1.00E+04 | 4.80E+01 | 7.64   |
|  |                        | 480 | 1.00E+04 | 4.80E+01 | 5.76   |
|  |                        | 480 | 1.00E+04 | 4.80E+01 | 4.61   |
|  |                        | 480 | 1.00E+04 | 4.80E+01 | 3.25   |
|  |                        | 480 | 1.00E+04 | 4.80E+01 | 2.30   |
|  | high torque 050 - DC   | 950 | 2.53E+04 | 3.75E+01 | 21.47  |
|  |                        | 950 | 2.53E+04 | 3.75E+01 | 17.17  |
|  |                        | 950 | 2.53E+04 | 3.75E+01 | 12.25  |
|  |                        | 950 | 2.53E+04 | 3.75E+01 | 8.59   |
|  |                        | 950 | 2.18E+04 | 4.36E+01 | 7.23   |
|  |                        | 950 | 2.18E+04 | 4.36E+01 | 5.76   |
|  |                        | 950 | 2.18E+04 | 4.36E+01 | 4.61   |
|  |                        | 950 | 2.18E+04 | 4.36E+01 | 3.25   |
|  |                        | 950 | 2.18E+04 | 4.36E+01 | 2.30   |
|  | high torque 110 - DC   | 560 | 7.68E+04 | 7.29E+00 | 19.79  |
|  |                        | 560 | 7.68E+04 | 7.29E+00 | 15.81  |
|  |                        | 560 | 7.68E+04 | 7.29E+00 | 11.31  |
|  |                        | 560 | 7.68E+04 | 7.29E+00 | 7.85   |
|  |                        | 560 | 6.38E+04 | 8.78E+00 | 6.60   |
|  |                        | 560 | 6.38E+04 | 8.78E+00 | 4.92   |
|  |                        | 560 | 4.55E+04 | 1.23E+01 | 4.29   |
|  |                        | 560 | 4.55E+04 | 1.23E+01 | 3.04   |
|  |                        | 560 | 4.55E+04 | 1.23E+01 | 2.09   |
|  | power 004 1-stage - DC | 15  | 3.60E+03 | 4.17E+00 | 157.08 |
|  |                        | 18  | 3.60E+03 | 5.00E+00 | 125.66 |
|  |                        | 26  | 3.60E+03 | 7.22E+00 | 89.74  |
|  |                        | 26  | 3.60E+03 | 7.22E+00 | 62.83  |
|  | power 004 2-stage - DC | 50  | 3.70E+03 | 1.35E+01 | 39.27  |
|  |                        | 50  | 3.70E+03 | 1.35E+01 | 31.42  |
|  |                        | 50  | 3.70E+03 | 1.35E+01 | 25.13  |
|  |                        | 50  | 3.70E+03 | 1.35E+01 | 22.41  |
|  |                        | 50  | 3.70E+03 | 1.35E+01 | 17.91  |
|  |                        | 50  | 3.30E+03 | 1.52E+01 | 15.71  |
|  |                        | 50  | 3.30E+03 | 1.52E+01 | 2.09   |
|  |                        | 50  | 3.30E+03 | 1.52E+01 | 9.01   |
|  |                        | 35  | 3.30E+03 | 1.06E+01 | 6.28   |
|  | power 010 1-stage - DC | 44  | 7.20E+03 | 6.11E+00 | 157.08 |
|  |                        | 56  | 7.20E+03 | 7.78E+00 | 125.66 |
|  |                        | 80  | 7.20E+03 | 1.11E+01 | 89.74  |
|  |                        | 85  | 7.20E+03 | 1.18E+01 | 62.83  |
|  | power 010 2-stage - DC | 130 | 7.40E+03 | 1.76E+01 | 39.27  |
|  |                        | 130 | 7.40E+03 | 1.76E+01 | 31.42  |
|  |                        | 130 | 7.40E+03 | 1.76E+01 | 25.13  |
|  |                        | 130 | 7.40E+03 | 1.76E+01 | 22.41  |
|  |                        | 130 | 7.40E+03 | 1.76E+01 | 17.91  |

|                                                      |                  |                                                                                                                                                                                                                                                                     |      |          |          |        |
|------------------------------------------------------|------------------|---------------------------------------------------------------------------------------------------------------------------------------------------------------------------------------------------------------------------------------------------------------------|------|----------|----------|--------|
|                                                      |                  |                                                                                                                                                                                                                                                                     | 130  | 6.00E+03 | 2.17E+01 | 15.71  |
|                                                      |                  |                                                                                                                                                                                                                                                                     | 130  | 6.00E+03 | 2.17E+01 | 12.57  |
|                                                      |                  |                                                                                                                                                                                                                                                                     | 130  | 6.00E+03 | 2.17E+01 | 9.01   |
|                                                      |                  |                                                                                                                                                                                                                                                                     | 100  | 6.00E+03 | 1.67E+01 | 6.28   |
|                                                      |                  | power 025 1 -stage - DC                                                                                                                                                                                                                                             | 112  | 1.40E+04 | 8.00E+00 | 157.08 |
|                                                      |                  |                                                                                                                                                                                                                                                                     | 141  | 1.40E+04 | 1.01E+01 | 125.66 |
|                                                      |                  |                                                                                                                                                                                                                                                                     | 199  | 1.40E+04 | 1.42E+01 | 89.74  |
|                                                      |                  |                                                                                                                                                                                                                                                                     | 200  | 1.40E+04 | 1.43E+01 | 62.83  |
|                                                      |                  | power 025 2 -stage - DC                                                                                                                                                                                                                                             | 350  | 1.45E+04 | 2.41E+01 | 39.27  |
|                                                      |                  |                                                                                                                                                                                                                                                                     | 350  | 1.45E+04 | 2.41E+01 | 31.42  |
|                                                      |                  |                                                                                                                                                                                                                                                                     | 380  | 1.45E+04 | 2.62E+01 | 25.13  |
|                                                      |                  |                                                                                                                                                                                                                                                                     | 350  | 1.45E+04 | 2.41E+01 | 22.41  |
|                                                      |                  |                                                                                                                                                                                                                                                                     | 380  | 1.45E+04 | 2.62E+01 | 17.91  |
|                                                      |                  |                                                                                                                                                                                                                                                                     | 305  | 1.03E+04 | 2.96E+01 | 15.71  |
|                                                      |                  |                                                                                                                                                                                                                                                                     | 380  | 1.03E+04 | 3.69E+01 | 12.57  |
|                                                      |                  |                                                                                                                                                                                                                                                                     | 330  | 1.03E+04 | 3.20E+01 | 9.01   |
|                                                      |                  |                                                                                                                                                                                                                                                                     | 265  | 1.03E+04 | 2.57E+01 | 6.28   |
|                                                      |                  | power 110 2 -stage - DC                                                                                                                                                                                                                                             | 1375 | 5.96E+04 | 2.31E+01 | 29.43  |
|                                                      |                  |                                                                                                                                                                                                                                                                     | 1600 | 5.96E+04 | 2.68E+01 | 23.56  |
|                                                      |                  |                                                                                                                                                                                                                                                                     | 1600 | 5.96E+04 | 2.68E+01 | 18.85  |
|                                                      |                  |                                                                                                                                                                                                                                                                     | 1600 | 5.96E+04 | 2.68E+01 | 16.86  |
|                                                      |                  |                                                                                                                                                                                                                                                                     | 1600 | 5.96E+04 | 2.68E+01 | 13.51  |
|                                                      |                  |                                                                                                                                                                                                                                                                     | 1600 | 5.23E+04 | 3.06E+01 | 1.26   |
|                                                      |                  |                                                                                                                                                                                                                                                                     | 1600 | 5.23E+04 | 3.06E+01 | 9.42   |
|                                                      |                  |                                                                                                                                                                                                                                                                     | 1600 | 5.23E+04 | 3.06E+01 | 6.70   |
|                                                      |                  |                                                                                                                                                                                                                                                                     | 1400 | 5.23E+04 | 2.68E+01 | 4.71   |
|                                                      |                  | power 110 1 -stage - DC                                                                                                                                                                                                                                             | 340  | 5.88E+04 | 5.78E+00 | 109.96 |
|                                                      |                  |                                                                                                                                                                                                                                                                     | 428  | 5.88E+04 | 7.28E+00 | 87.96  |
|                                                      |                  |                                                                                                                                                                                                                                                                     | 603  | 5.88E+04 | 1.03E+01 | 67.33  |
|                                                      |                  |                                                                                                                                                                                                                                                                     | 555  | 5.88E+04 | 9.44E+00 | 47.12  |
|                                                      |                  | <a href="https://www.physikinstrumente.com/en/products/rotation-stages/v-611-compact-primae-rotation-stage-412418470/#specification">https://www.physikinstrumente.com/en/products/rotation-stages/v-611-compact-primae-rotation-stage-412418470/#specification</a> | 1.9  | 1.20E+03 | 1.58E+00 | 0.84   |
|                                                      |                  | <a href="https://www.physikinstrumente.com/en/products/rotation-stages/v-610-compact-primae-rotation-stage-412418469/#specification">https://www.physikinstrumente.com/en/products/rotation-stages/v-610-compact-primae-rotation-stage-412418469/#specification</a> | 1.2  | 6.30E+02 | 1.90E+00 | 9.42   |
|                                                      |                  | <a href="https://www.physikinstrumente.com/en/products/rotation-stages/l-611-precision-rotation-stage-1202002/#specification">https://www.physikinstrumente.com/en/products/rotation-stages/l-611-precision-rotation-stage-1202002/#specification</a>               | 40   | 1.10E+03 | 3.64E+01 | 3.49   |
| TPM+ Servo Actuators (Rare Earth Permanent Magnetic) | dynamic 004 - AC |                                                                                                                                                                                                                                                                     | 2    | 2.20E+03 | 9.09E+01 | 628.32 |

| <a href="https://www.wittenstein.de/download/operating-manual-tpm-plus-en.pdf">https://www.wittenstein.de/download/operating-manual-tpm-plus-en.pdf</a> |                      |       |          |          |        |  |  |
|---------------------------------------------------------------------------------------------------------------------------------------------------------|----------------------|-------|----------|----------|--------|--|--|
|                                                                                                                                                         | dynamic 010 - AC     | 0.98  | 2.00E+03 | 4.90E+01 | 628.32 |  |  |
|                                                                                                                                                         |                      | 3.8   | 4.80E+03 | 7.92E+01 | 628.32 |  |  |
|                                                                                                                                                         |                      | 1.9   | 4.30E+03 | 4.42E+01 | 628.32 |  |  |
|                                                                                                                                                         | dynamic 025 - AC     | 12.1  | 8.50E+03 | 1.42E+00 | 628.32 |  |  |
|                                                                                                                                                         |                      | 4.4   | 7.10E+03 | 6.20E+01 | 628.32 |  |  |
|                                                                                                                                                         | dynamic 050 - AC     | 28.9  | 1.85E+04 | 1.56E+00 | 523.60 |  |  |
|                                                                                                                                                         |                      | 7.8   | 1.47E+04 | 5.31E+01 | 523.60 |  |  |
|                                                                                                                                                         | dynamic 110 - AC     | 43.9  | 3.71E+04 | 1.18E+00 | 387.46 |  |  |
|                                                                                                                                                         |                      | 28.9  | 3.59E+04 | 8.05E+01 | 523.60 |  |  |
|                                                                                                                                                         | high torque 010 - AC | 11.98 | 7.60E+03 | 1.58E+00 | 507.89 |  |  |
|                                                                                                                                                         |                      | 11.98 | 8.00E+03 | 1.50E+00 | 507.89 |  |  |
|                                                                                                                                                         |                      | 11.98 | 8.00E+03 | 1.50E+00 | 507.89 |  |  |
|                                                                                                                                                         |                      | 4.4   | 6.50E+03 | 6.77E+01 | 507.89 |  |  |
|                                                                                                                                                         | high torque 025 - AC | 28.9  | 1.48E+04 | 1.95E+00 | 507.89 |  |  |
|                                                                                                                                                         |                      | 11.98 | 1.00E+04 | 1.20E+00 | 507.89 |  |  |
|                                                                                                                                                         |                      | 11.98 | 1.00E+04 | 1.20E+00 | 507.89 |  |  |
|                                                                                                                                                         |                      | 11.98 | 1.00E+04 | 1.20E+00 | 507.89 |  |  |
|                                                                                                                                                         |                      | 11.98 | 1.00E+04 | 1.20E+00 | 507.89 |  |  |
|                                                                                                                                                         | high torque 050 - AC | 56.6  | 2.53E+04 | 2.24E+00 | 471.24 |  |  |
|                                                                                                                                                         |                      | 28.9  | 2.18E+04 | 1.33E+00 | 507.89 |  |  |
|                                                                                                                                                         |                      | 28.9  | 2.18E+04 | 1.33E+00 | 507.89 |  |  |
|                                                                                                                                                         |                      | 28.9  | 2.18E+04 | 1.33E+00 | 507.89 |  |  |
|                                                                                                                                                         |                      | 28.9  | 2.18E+04 | 1.33E+00 | 507.89 |  |  |
|                                                                                                                                                         |                      | 28.9  | 2.18E+04 | 1.33E+00 | 507.89 |  |  |
|                                                                                                                                                         |                      | 28.9  | 2.18E+04 | 1.33E+00 | 507.89 |  |  |
|                                                                                                                                                         | high torque 110 - AC | 164.5 | 7.68E+04 | 2.14E+00 | 434.59 |  |  |
|                                                                                                                                                         |                      | 88    | 6.38E+04 | 1.38E+00 | 434.59 |  |  |
|                                                                                                                                                         |                      | 88    | 6.38E+04 | 1.38E+00 | 434.59 |  |  |
|                                                                                                                                                         |                      | 56.6  | 4.55E+04 | 1.24E+00 | 471.24 |  |  |
|                                                                                                                                                         |                      | 56.6  | 4.55E+04 | 1.24E+00 | 471.24 |  |  |
|                                                                                                                                                         |                      | 3.8   | 3.60E+03 | 1.06E+00 | 628.32 |  |  |
|                                                                                                                                                         | power 004 - AC       | 3.8   | 3.70E+03 | 1.03E+00 | 628.32 |  |  |
|                                                                                                                                                         |                      | 1.9   | 3.30E+03 | 5.76E+01 | 628.32 |  |  |
|                                                                                                                                                         |                      | 12.1  | 7.20E+03 | 1.68E+00 | 628.32 |  |  |
|                                                                                                                                                         | power 010 - AC       | 12.1  | 7.40E+03 | 1.64E+00 | 628.32 |  |  |
|                                                                                                                                                         |                      | 4.4   | 6.00E+03 | 7.33E+01 | 628.32 |  |  |
|                                                                                                                                                         |                      | 28.9  | 1.40E+04 | 2.06E+00 | 628.32 |  |  |
|                                                                                                                                                         | power 025 - AC       | 28.9  | 1.45E+04 | 1.99E+00 | 628.32 |  |  |
|                                                                                                                                                         |                      | 7.8   | 1.03E+04 | 7.57E+01 | 628.32 |  |  |
|                                                                                                                                                         | power 050 - AC       | 56.6  | 2.36E+04 | 2.40E+00 | 523.60 |  |  |
|                                                                                                                                                         |                      | 56.6  | 2.51E+04 | 2.25E+00 | 523.60 |  |  |
|                                                                                                                                                         |                      | 15.6  | 1.94E+04 | 8.04E+01 | 523.60 |  |  |
|                                                                                                                                                         | power 110 - AC       | 88    | 5.88E+04 | 1.50E+00 | 439.82 |  |  |
|                                                                                                                                                         |                      | 88    | 5.96E+04 | 1.48E+00 | 439.82 |  |  |
|                                                                                                                                                         |                      | 44.2  | 5.23E+04 | 8.45E+01 | 471.24 |  |  |

Hydraulic

|                   | HKS DZK and DEK Series(track and pinion) |        |          |          |        |  |  |
|-------------------|------------------------------------------|--------|----------|----------|--------|--|--|
|                   |                                          | 1600   | 2.50E+04 | 6.40E+01 | 5.71   |  |  |
|                   |                                          | 3200   | 4.50E+04 | 7.11E+01 | 5.71   |  |  |
|                   |                                          | 6300   | 7.50E+04 | 8.40E+01 | 4.19   |  |  |
|                   |                                          | 12600  | 1.10E+05 | 1.15E+02 | 2.51   |  |  |
|                   |                                          | 25600  | 2.20E+05 | 1.16E+02 | 1.80   |  |  |
|                   |                                          | 49500  | 5.00E+05 | 9.90E+01 | 1.26   |  |  |
|                   |                                          | 69800  | 5.80E+05 | 1.20E+02 | 1.26   |  |  |
|                   |                                          | 101000 | 8.50E+05 | 1.19E+02 | 0.79   |  |  |
|                   |                                          | 141500 | 1.10E+06 | 1.29E+02 | 0.63   |  |  |
|                   |                                          | 190000 | 1.50E+06 | 1.27E+02 | 0.52   |  |  |
|                   |                                          | 490    | 1.80E+04 | 2.72E+01 | 7.85   |  |  |
|                   |                                          | 910    | 2.50E+04 | 3.64E+01 | 7.85   |  |  |
|                   |                                          | 1790   | 4.00E+04 | 4.48E+01 | 5.24   |  |  |
|                   |                                          | 3250   | 1.10E+05 | 2.95E+01 | 5.24   |  |  |
|                   |                                          | 5650   | 1.00E+05 | 5.65E+01 | 2.86   |  |  |
|                   |                                          | 10600  | 1.60E+05 | 6.63E+01 | 2.51   |  |  |
|                   |                                          | 15110  | 2.20E+05 | 7.05E+01 | 1.80   |  |  |
|                   |                                          | 21710  | 3.00E+05 | 7.24E+01 | 1.80   |  |  |
|                   |                                          | 29310  | 4.20E+05 | 6.98E+01 | 1.40   |  |  |
|                   |                                          | 40710  | 5.50E+05 | 7.40E+01 | 1.40   |  |  |
|                   |                                          | 93     | 5.00E+03 | 18.600   | 90.478 |  |  |
| EATON Xcel Motors | XLH Series (016-53)                      | 116    | 5.30E+03 | 21.887   | 84.404 |  |  |
| EATON Xcel Motors | XLH Series (016-63)                      | 145    | 5.50E+03 | 26.364   | 88.802 |  |  |
| EATON Xcel Motors | XLH Series (016-80)                      | 181    | 6.10E+03 | 29.672   | 71.000 |  |  |
| EATON Xcel Motors | XLH Series (016-100)                     | 223    | 6.20E+03 | 35.968   | 57.701 |  |  |
| EATON Xcel Motors | XLH Series (016-125)                     | 260    | 6.40E+03 | 40.625   | 44.087 |  |  |
| EATON Xcel Motors | XLH Series (016-160)                     | 324    | 6.70E+03 | 48.358   | 35.709 |  |  |
| EATON Xcel Motors | XLH Series (016-200)                     | 391    | 7.10E+03 | 55.070   | 29.531 |  |  |
| EATON Xcel Motors | XLH Series (016-245)                     | 508    | 7.40E+03 | 68.649   | 21.886 |  |  |
| EATON Xcel Motors | XLH Series (016-315)                     | 547    | 7.70E+03 | 71.039   | 17.907 |  |  |
| EATON Xcel Motors | XLH Series (016-390)                     | 507    | 8.00E+03 | 63.375   | 14.451 |  |  |
| EATON Xcel Motors | XLH Series (016-485)                     | 116    | 6.30E+03 | 18.413   | 91.630 |  |  |
| EATON Xcel Motors | XLH Series (036-50)                      | 192    | 7.00E+03 | 27.429   | 86.917 |  |  |
| EATON Xcel Motors | XLH Series (036-80)                      | 241    | 7.50E+03 | 32.133   | 69.639 |  |  |
| EATON Xcel Motors | XLH Series (036-100)                     | 273    | 7.70E+03 | 35.455   | 53.931 |  |  |
| EATON Xcel Motors | XLH Series (036-130)                     | 328    | 7.10E+03 | 46.197   | 44.506 |  |  |
| EATON Xcel Motors | XLH Series (036-160)                     | 379    | 8.00E+03 | 47.375   | 36.024 |  |  |
| EATON Xcel Motors | XLH Series (036-195)                     | 437    | 8.40E+03 | 52.024   | 28.798 |  |  |
| EATON Xcel Motors | XLH Series (036-245)                     | 444    | 9.40E+03 | 47.234   | 22.515 |  |  |
| EATON Xcel Motors | XLH Series (036-305)                     | 512    | 9.60E+03 | 53.333   | 17.907 |  |  |
| EATON Xcel Motors | XLH Series (036-395)                     | 345    | 7.30E+03 | 47.260   | 95.086 |  |  |



|                   |                                                                                                                                                                                                                                                                                                                                              |          |          |          |        |
|-------------------|----------------------------------------------------------------------------------------------------------------------------------------------------------------------------------------------------------------------------------------------------------------------------------------------------------------------------------------------|----------|----------|----------|--------|
| EATON Xcel Motors | XI2 Series (100)                                                                                                                                                                                                                                                                                                                             | 445      | 7.50E+03 | 59.333   | 96.761 |
| EATON Xcel Motors | XI2 Series (130)                                                                                                                                                                                                                                                                                                                             | 560      | 7.70E+03 | 72.727   | 75.294 |
| EATON Xcel Motors | XI2 Series (160)                                                                                                                                                                                                                                                                                                                             | 570      | 7.90E+03 | 72.152   | 74.665 |
| EATON Xcel Motors | XI2 Series (195)                                                                                                                                                                                                                                                                                                                             | 665      | 8.40E+03 | 79.167   | 60.423 |
| EATON Xcel Motors | XI2 Series (245)                                                                                                                                                                                                                                                                                                                             | 820      | 8.80E+03 | 93.182   | 48.381 |
| EATON Xcel Motors | XI2 Series (305)                                                                                                                                                                                                                                                                                                                             | 885      | 9.30E+03 | 95.161   | 38.223 |
| EATON Xcel Motors | XI2 Series (395)                                                                                                                                                                                                                                                                                                                             | 925      | 9.80E+03 | 94.388   | 30.055 |
| EATON Xcel Motors | XI2 Series (490)                                                                                                                                                                                                                                                                                                                             | 930      | 1.02E+04 | 91.176   | 24.086 |
| EATON Xcel Motors | XI4 Series (160)                                                                                                                                                                                                                                                                                                                             | 705      | 1.41E+04 | 50.000   | 72.571 |
| EATON Xcel Motors | XI4 Series (205)                                                                                                                                                                                                                                                                                                                             | 800      | 1.45E+04 | 55.172   | 57.177 |
| EATON Xcel Motors | XI4 Series (245)                                                                                                                                                                                                                                                                                                                             | 845      | 1.47E+04 | 57.483   | 55.711 |
| EATON Xcel Motors | XI4 Series (310)                                                                                                                                                                                                                                                                                                                             | 1065     | 1.56E+04 | 68.269   | 44.192 |
| EATON Xcel Motors | XI4 Series (395)                                                                                                                                                                                                                                                                                                                             | 1185     | 1.66E+04 | 71.386   | 39.375 |
| Hydraulic         | XI4 Series (495)                                                                                                                                                                                                                                                                                                                             | 1170     | 1.79E+04 | 65.363   | 31.940 |
| <b>Piezo</b>      |                                                                                                                                                                                                                                                                                                                                              |          |          |          |        |
|                   | Rotary Piezo Actuator( <a href="http://www.cedrat-technologies.com/en/technologies/actuators/piezo-motors-and-electronics.html">http://www.cedrat-technologies.com/en/technologies/actuators/piezo-motors-and-electronics.html</a> )                                                                                                         | 0.15     | 330      | 4.55E-01 | 14.66  |
|                   | Q-622 Q-Motion® Miniature Rotation Stage ( <a href="https://www.physikinstrumente.com/en/products/miniature-stages/miniature-rotation-stages/q-622-q-motion-miniature-rotation-stage-103190/">https://www.physikinstrumente.com/en/products/miniature-stages/miniature-rotation-stages/q-622-q-motion-miniature-rotation-stage-103190/</a> ) | 5.00E-03 | 15       | 3.33E-01 | 1.22   |
|                   |                                                                                                                                                                                                                                                                                                                                              | 5.00E-03 | 12       | 4.17E-01 | 1.22   |
|                   |                                                                                                                                                                                                                                                                                                                                              | 5.00E-03 | 12       | 4.17E-01 | 1.22   |
|                   |                                                                                                                                                                                                                                                                                                                                              | 6.00E-03 | 25       | 2.40E-01 | 0.79   |
|                   |                                                                                                                                                                                                                                                                                                                                              | 6.00E-03 | 21       | 2.86E-01 | 0.79   |
|                   |                                                                                                                                                                                                                                                                                                                                              | 6.00E-03 | 21       | 2.86E-01 | 0.79   |
|                   |                                                                                                                                                                                                                                                                                                                                              | 5.00E-03 | 9        | 5.56E-01 | 1.22   |
|                   |                                                                                                                                                                                                                                                                                                                                              | 5.00E-03 | 9        | 5.56E-01 | 1.22   |
|                   |                                                                                                                                                                                                                                                                                                                                              | 0.3      | 500      | 6.00E-01 | 9.42   |
|                   | <a href="https://www.physikinstrumente.com/en/products/miniature-stages/miniature-rotation-stages/n-651-rotation-stage-with-low-profile-design-703071/#specification">https://www.physikinstrumente.com/en/products/miniature-stages/miniature-rotation-stages/n-651-rotation-stage-with-low-profile-design-703071/#specification</a>        | 0.03     | 300      | 1.00E-01 | 12.57  |
|                   | <a href="https://www.physikinstrumente.com/en/products/miniature-stages/miniature-rotation-stages/n-622-pilze-rotation-stage-703081/#specification">https://www.physikinstrumente.com/en/products/miniature-stages/miniature-rotation-stages/n-622-pilze-rotation-stage-703081/#specification</a>                                            | 0.005    | 120      | 4.17E-02 | 12.57  |

|            |                                                                                                                                                                                                                                                                                                                         |          |          |          |       |
|------------|-------------------------------------------------------------------------------------------------------------------------------------------------------------------------------------------------------------------------------------------------------------------------------------------------------------------------|----------|----------|----------|-------|
|            | <a href="https://www.physikinstrumente.com/en/products/miniature-stages/miniature-rotation-stages/l-624-pilne-rotation-stage-7030690/#specification">https://www.physikinstrumente.com/en/products/miniature-stages/miniature-rotation-stages/l-624-pilne-rotation-stage-7030690/#specification</a>                     | 0.01     | 130      | 7.69E-02 | 12.57 |
|            | <a href="https://www.cedrat-technologies.com/fileadmin/user_upload/CTH/C/Technologies/Actuators/Piezo_motors_electronics/fiche_RPA/Rotary_Piezo_Motor_RPA.pdf">https://www.cedrat-technologies.com/fileadmin/user_upload/CTH/C/Technologies/Actuators/Piezo_motors_electronics/fiche_RPA/Rotary_Piezo_Motor_RPA.pdf</a> | 0.15     | 330      | 4.55E-01 | 14.66 |
|            | <a href="https://www.physikinstrumente.com/en/products/miniature-stages/miniature-rotation-stages/l-628-pilne-rotation-stage-7030660/#specification">https://www.physikinstrumente.com/en/products/miniature-stages/miniature-rotation-stages/l-628-pilne-rotation-stage-7030660/#specification</a>                     | 0.025    | 300      | 8.33E-02 | 12.57 |
|            | <a href="https://www.physikinstrumente.com/en/products/miniature-stages/miniature-rotation-stages/q-632-g-motion-rotation-stage-111229/#specification">https://www.physikinstrumente.com/en/products/miniature-stages/miniature-rotation-stages/q-632-g-motion-rotation-stage-111229/#specification</a>                 | 0.007    | 25       | 2.80E-01 | 0.35  |
| Piezo LEGS | LR17 version A21 - Standard - With Position Sensor                                                                                                                                                                                                                                                                      | 0.015    | 30       | 5.00E-01 | 2.97  |
| Piezo LEGS | LR50 version 12D - Non-Magnetic - Vacuum                                                                                                                                                                                                                                                                                | 0.025    | 60       | 4.17E-01 | 1.75  |
| Piezo LEGS | LR80 version 12A - Standard                                                                                                                                                                                                                                                                                             | 0.04     | 60       | 6.67E-01 | 1.75  |
| Piezo LEGS | LR80 version 12B - Vacuum                                                                                                                                                                                                                                                                                               | 0.04     | 60       | 6.67E-01 | 1.75  |
| <b>SMA</b> |                                                                                                                                                                                                                                                                                                                         |          |          |          |       |
|            | <a href="https://iopscience.iop.org/article/10.1088/0964-1726/21/6/065013/meta">https://iopscience.iop.org/article/10.1088/0964-1726/21/6/065013/meta</a>                                                                                                                                                               | 4.20E-03 | 0.05     | 8.40E+01 | 1.75  |
|            | <a href="https://iopscience.iop.org/article/10.1088/0964-1726/19/12/125014">https://iopscience.iop.org/article/10.1088/0964-1726/19/12/125014</a>                                                                                                                                                                       | 4.70E-03 | 3.30E-02 | 1.42E+02 | 1.01  |
|            |                                                                                                                                                                                                                                                                                                                         | 4.50E-03 | 0.035    | 1.29E+02 | 0.92  |
|            |                                                                                                                                                                                                                                                                                                                         | 4.50E-03 | 3.50E-02 | 1.29E+02 | 1.26  |
|            | <a href="https://www.sciencedirect.com/science/article/pii/S0924424719300573">https://www.sciencedirect.com/science/article/pii/S0924424719300573</a>                                                                                                                                                                   | 0.0733   | 10.2     | 7.19E+00 | 1.87  |
|            | <a href="https://www.sciencedirect.com/science/article/pii/S0924424709005169#fig2">https://www.sciencedirect.com/science/article/pii/S0924424709005169#fig2</a>                                                                                                                                                         | 1.96     | 0.8      | 2.45E+03 | 4.19  |

Weight is an estimation of SMA material only\_ Torque is 0.14\*30d\_ Velocity is for 30d and 2A current
